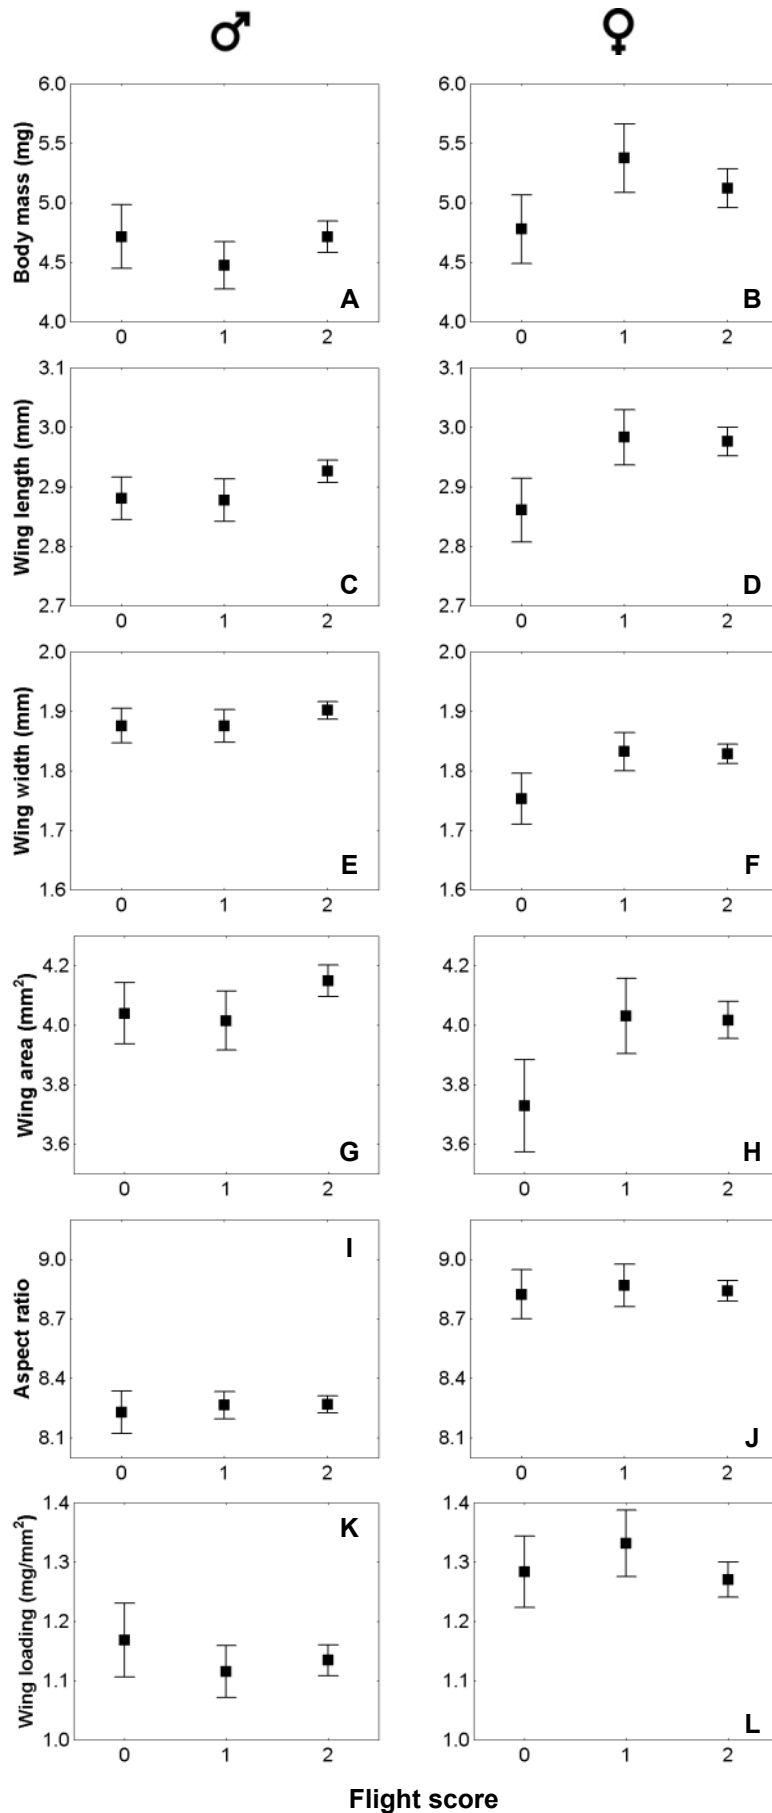

**Fig. S1.** Recorded flight scores (0=failure, 1=lift, 2=flight) across the range of test temperatures as a function of  $M_b$  (A,B), wing length (C-D), wing width (E-F), wing area (G-H), aspect ratio (I-J) and wing loading (K-L) in *Ceratitis capitata*.

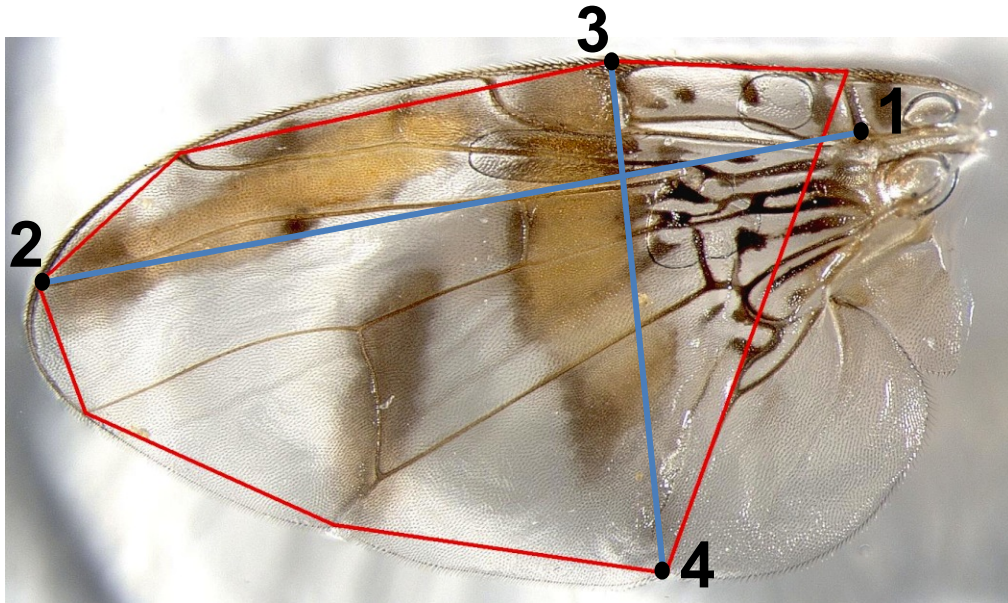

**Fig. S2. Landmarks used for measuring the wing length (1 to 2), wing width (3 to 4) and wing area (red lines) of *Ceratitis capitata*.** 1=antero-anal corner of cell c; 2=termination of vein R<sub>4+5</sub>, inner side of cell R<sub>2+3</sub>; 3=subcostal break (Scb); 4=A<sub>1</sub>+Cu<sub>2</sub> termination; and the red lines run between the antero-costal corner of cell c, Scb, R<sub>2+3</sub>, R<sub>4+5</sub>, M, Cu<sub>1</sub> and A<sub>1</sub>+Cu<sub>2</sub> termination landmarks on the edge of the wing. These landmarks were present on wings from all individuals.

**Table S1.** Generalized linear models (GLZ) showing the effect of (A) Acclimation temperature ( $T_{acc}$ ) and body mass ( $M_b$ ); (B)  $T_{acc}$  and sex; and C)  $T_{acc}$  and flight score (0, 1 or 2, “Score”) on aspect ratio ( $AR$ ) and wing loading ( $WL$ ) in *Ceratitis capitata* flies (M=males; F=females).  $AR$  was calculated as  $2 \log(4R) - \log S$  and  $WL$  was calculated as  $\log M_b - \log R$  (where  $R$  is length in mm and  $S$  is the wing area in  $mm^2$ ). Significant effects are highlighted in bold.

| Effect                        | Sex | DF | Aspect Ratio    |                   | Wing Loading    |                   |
|-------------------------------|-----|----|-----------------|-------------------|-----------------|-------------------|
|                               |     |    | Wald $\chi^2$   | P value           | Wald $\chi^2$   | P value           |
| Intercept                     |     | 1  | <b>14482.29</b> | <b>&lt;0.0001</b> | <b>3513.79</b>  | <b>&lt;0.0001</b> |
| $T_{acc}$                     | M   | 3  | 4.34            | 0.227             | <b>10.38</b>    | <b>0.016</b>      |
| $M_b$                         |     | 1  | 1.02            | 0.312             | <b>1101.29</b>  | <b>&lt;0.0001</b> |
| $T_{acc} \times M_b$          |     | 3  | 1.28            | 0.735             | <b>11.08</b>    | <b>0.011</b>      |
| Intercept                     |     | 1  | <b>12268.60</b> | <b>&lt;0.0001</b> | <b>4736.26</b>  | <b>&lt;0.0001</b> |
| $T_{acc}$                     | F   | 3  | 3.56            | 0.313             | <b>13.78</b>    | <b>0.003</b>      |
| $M_b$                         |     | 1  | 0.43            | 0.511             | <b>1314.45</b>  | <b>&lt;0.0001</b> |
| $T_{acc} \times M_b$          |     | 3  | 2.94            | 0.401             | <b>13.64</b>    | <b>0.003</b>      |
| Intercept                     |     | 1  | <b>961556.6</b> | <b>&lt;0.0001</b> | <b>10970.69</b> | <b>&lt;0.0001</b> |
| $T_{acc}$                     | All | 3  | <b>54.3</b>     | <b>&lt;0.0001</b> | <b>14.58</b>    | <b>0.002</b>      |
| Sex                           |     | 1  | <b>485.3</b>    | <b>&lt;0.0001</b> | <b>24.08</b>    | <b>&lt;0.0001</b> |
| $T_{acc} \times \text{Sex}$   |     | 3  | 4.7             | 0.195             | 7.75            | 0.052             |
| Intercept                     |     | 1  | <b>396639.2</b> | <b>&lt;0.0001</b> | <b>3536.81</b>  | <b>&lt;0.0001</b> |
| $T_{acc}$                     | M   | 3  | <b>32.2</b>     | <b>&lt;0.0001</b> | <b>13.87</b>    | <b>0.003</b>      |
| Score                         |     | 2  | 1.2             | 0.561             | 4.27            | 0.118             |
| $T_{acc} \times \text{Score}$ |     | 6  | 3.1             | 0.791             | 4.15            | 0.656             |
| Intercept                     |     | 1  | <b>289790.0</b> | <b>&lt;0.0001</b> | <b>3397.90</b>  | <b>&lt;0.0001</b> |
| $T_{acc}$                     | F   | 3  | <b>18.8</b>     | <b>&lt;0.001</b>  | 4.22            | 0.239             |
| Score                         |     | 2  | 0.3             | 0.867             | 1.66            | 0.435             |
| $T_{acc} \times \text{Score}$ |     | 6  | 12.1            | 0.060             | 6.97            | 0.323             |
